# Supplementary material for: Prognostic significance of positive peritoneal cytology in resectable pancreatic cancer: a systemic review and meta-analysis
Source: PubMed Central journal article supplement (PMC5362462; doi:10.18632/oncotarget.14745), 2017-01-19
Supplement: oncotarget-08-15004-s001.pdf [file oncotarget-08-15004-s001.pdf]

## Prognostic significance of positive peritoneal cytology in resectable pancreatic cancer: a systemic review and meta-analysis

### Supplementary Materials

**Supplementary Table 1: Risk of bias in the included retrospective cohort studies (by the Newcastle–Ottawa quality assessment tool)**

| References  | Selection/4 | Comparability/2 | Outcome/3 | Total score |
|-------------|-------------|-----------------|-----------|-------------|
| Iwagami     | 3           | 2               | 3         | 8           |
| Satoi       | 3           | 1               | 2         | 6           |
| Hirabayashi | 3           | 1               | 2         | 6           |
| Aoyama      | 3           | 1               | 3         | 7           |
| Yamada      | 3           | 1               | 2         | 6           |
| Yoshioka    | 3           | 2               | 3         | 8           |
| Ferrione    | 3           | 1               | 2         | 6           |
| Meszoely    | 3           | 1               | 2         | 6           |
| Konishi     | 3           | 1               | 2         | 6           |
| Yachida     | 3           | 1               | 2         | 6           |

**Appendix: Newcastle-Ottawa Scale (NOS) for quality assessment**

| <b>Selection</b>                                                         |                                                                                                                                                                                                                                                                                                                          |
|--------------------------------------------------------------------------|--------------------------------------------------------------------------------------------------------------------------------------------------------------------------------------------------------------------------------------------------------------------------------------------------------------------------|
| Representativeness of the exposed cohort                                 | a) truly representative of the average potentially resectable pancreatic cancer in the community (※)<br>b) somewhat representative of the average potentially resectable pancreatic cancer in the community (※)<br>c) selected group of users eg nurses, volunteers<br>d) no description of the derivation of the cohort |
| Selection of the non-exposed cohort                                      | a) drawn from the same community as the exposed cohort (※)<br>b) drawn from a different source<br>c) no description of the derivation of the non- exposed cohort                                                                                                                                                         |
| Ascertainment of exposure                                                | a) surgical records (※)<br>b) structured interview (※)<br>c) written self report<br>d) no description                                                                                                                                                                                                                    |
| Demonstration that outcome of interest was not present at start of study | a) yes (※)<br>b) no                                                                                                                                                                                                                                                                                                      |
| <b>Comparability</b>                                                     |                                                                                                                                                                                                                                                                                                                          |
| Comparability of cohorts on the basis of the design or analysis          | a) The tumor size between exposed cohort and non-exposed cohort had no statistical differences(※)<br>b) The age(sex, T, N stage etc) between exposed cohort and non-exposed cohort had no statistical differences (※)                                                                                                    |
| <b>Outcome</b>                                                           |                                                                                                                                                                                                                                                                                                                          |
| Assessment of outcome                                                    | a) independent blind assessment (※)<br>b) record linkage (※)<br>c) self report<br>d) no description                                                                                                                                                                                                                      |
| Was follow-up long enough for outcomes to occur? (death or recurrence)   | a) yes (24 months) (※)<br>b) no                                                                                                                                                                                                                                                                                          |
| Adequacy of follow up of cohorts                                         | a) complete follow up - all subjects accounted for (※)<br>b) subjects lost to follow up unlikely to introduce bias - small number lost (less than 25%) or description provided of those lost) (※)<br>c) follow up rate < 75% and no description of those lost<br>d) no statement                                         |

Note: A study can be awarded a maximum of one star for each numbered item within the Selection and Outcome categories. A maximum of two stars can be given for Comparability.
